# Supplementary material for: Quantifying Downstream, Vertical and Lateral Variation in Fluvial Deposits: Implications From the Huesca Distributive Fluvial System
Source: Frontiers journal article supplement (doi:10.3389/feart.2020.564017), 2021-02-11
Supplement: Table_1.XLSX [file Table_1.XLSX]

## Sheet: Sheet1
Location	N	E	General outcrop orientation	Web links (if publicly available)
Monzon	41.9019	0.193267	305-125	N/A
Monte Aragon	42.1623	-0.364417	312-132	N/A
Castle Florite	41.8139	-0.010747	273-0.93	N/A
Piraces	42.014	-0.315080	272-0.92	Consortium held outcrop - SafariDB https://safaridb.com/home
Pertusa	42.0014	-0.130748	156-336	Consortium held outcrop - SafariDB https://safaridb.com/home
Torrollon	41.9268	-0.25821	323-143	https://v3geo.com/model/29
Bolea	42.2573	-0.554265	292-112	https://v3geo.com/model/22
Sigena	41.6788	-0.152722	314-134	Consortium held outcrop - SafariDB https://safaridb.com/home
